# Supplementary material for: Hsa_circ_0010957 level is increased and sponges microRNA-125b in CD4+ T cells of patients with systemic lupus erythematosus
Source: PubMed Central journal article supplement — Mol Med Rep. 2021 Apr 20;23(6):469. doi: 10.3892/mmr.2021.12108 (PMC8097751; doi:10.3892/mmr.2021.12108), 2021-04-20

Figure S1. Hsa\_circ\_0010957 regulates STAT3 signaling via miR-125b in CD4+ T cells of healthy controls. (A and B) STAT3 protein level after transfecting miR-125b mimics or inhibitor into CD4+ T cells of healthy controls. (C) STAT3 and phosphorylated STAT3 protein level after transfecting hsa\_circ\_0010957 siRNA and miR-125b inhibitor into CD4+ T cells of healthy controls. (D-F) IL-18, IL-6 and IL-17 levels detected in cell supernatant after transfecting STAT3 siRNA into CD4+ T cells of healthy controls. Data are shown as mean  $\pm$  S.D. \* $P$ <0.05. NS, no significance; miR, microRNA; siRNA, small interfering RNA; IL, interleukin; NC, negative control.

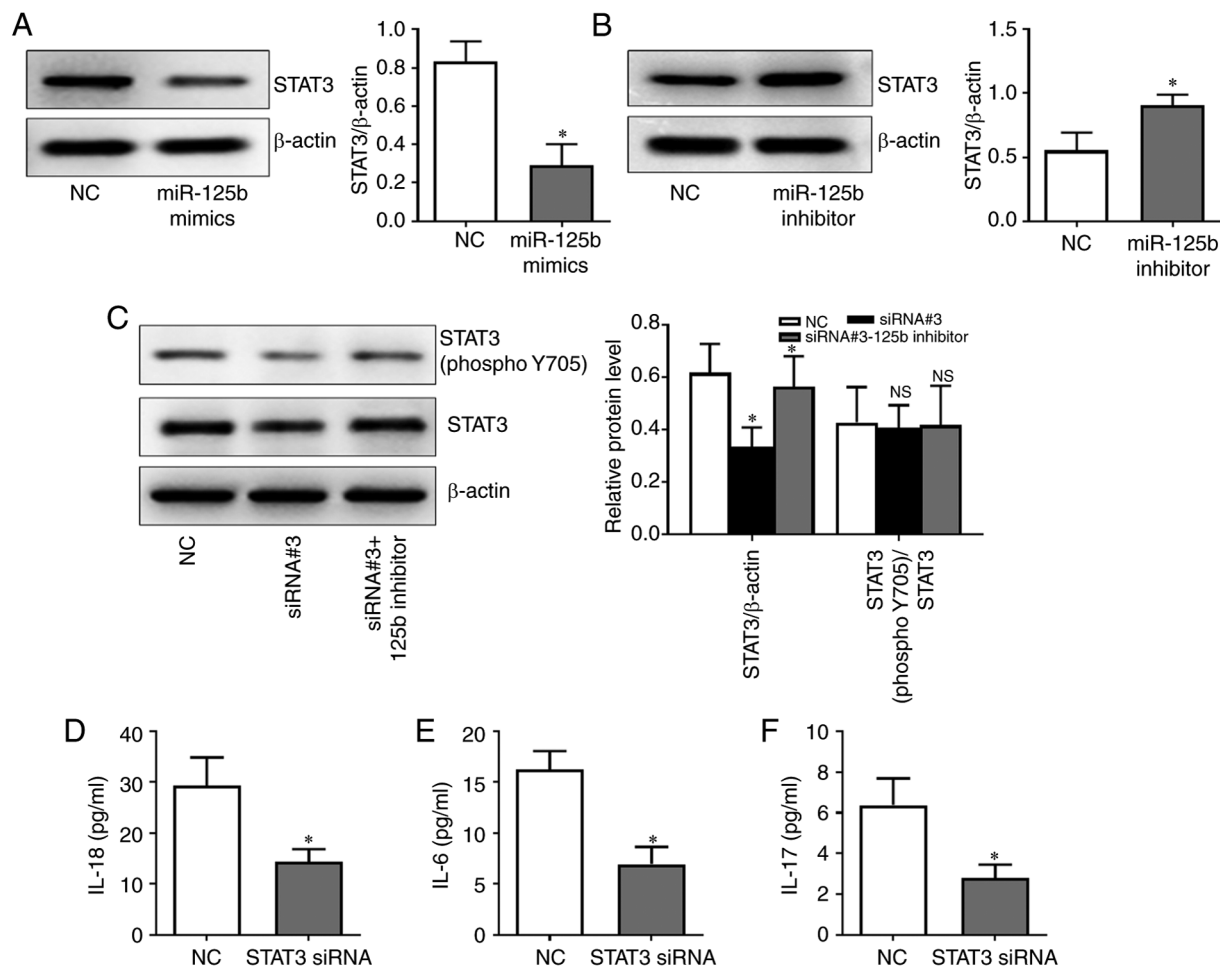

Supplement: Supplementary_Data.pdf [file Supplementary_Data.pdf]
